# Supplementary material for: Assessment of Ingested Micro- and Nanoplastic (MNP)-Mediated Genotoxicity in an In Vitro Model of the Small Intestinal Epithelium (SIE)
Source: MDPI journal article supplement (doi:10.3390/nano14090807), 2024-05-06
Supplement: s1 [file s1]

# Assessment of Ingested Micro- and Nanoplastic (MNP)-Mediated Genotoxicity in an In Vitro Model of the Small Intestinal Epithelium (SIE)

Zhenning Yang <sup>1,2</sup>, Glen M DeLoid <sup>1,3</sup>, Joshua Baw <sup>2</sup>, Helmut Zarbl <sup>3,4</sup> and Philip Demokritou <sup>1,3,4,\*</sup>

<sup>1</sup> Nanoscience and Advanced Materials Center, Environmental and Occupational Health Sciences Institute, Rutgers University, Piscataway, NJ, 08854

<sup>2</sup> Ernest Mario School of Pharmacy, Rutgers University, Piscataway, NJ, 08854

<sup>3</sup> Environmental and Occupational Health Sciences Institute, Rutgers University, Piscataway, NJ, 08854

<sup>4</sup> School of Public Health, Rutgers University, Piscataway, NJ, 08854. zy163@gsbs.rutgers.edu (Z.Y.); gd424@eohsi.rutgers.edu (G.M.D.); jab954@scarletmail.rutgers.edu (J.B.); hz151@eohsi.rutgers.edu (H.Z.)

\* Correspondence: philip.demokritou@rutgers.edu

**Supplementary Table S1.** Statistical Analysis Results of Colloidal properties of test MNPs in FFM.

|                               | Concentration<br>(mg/mL) | PS25C      | PS1KC    | PEI PM <sub>0.1</sub> |
|-------------------------------|--------------------------|------------|----------|-----------------------|
| Hydrodynamic diameter<br>(nm) | 0.05 vs. 0.25            | ns         | $p<0.05$ | $p<0.0001$            |
|                               | 0.05 vs. 1.0             | $p<0.0001$ | $p<0.01$ | $p<0.0001$            |
|                               | 0.25 vs. 1.0             | $p<0.0001$ | $p<0.05$ | $p<0.0001$            |
| Polydispersity Index/PdI      | 0.05 vs. 0.25            | ns         | ns       | $p<0.01$              |
|                               | 0.05 vs. 1.0             | $p<0.001$  | ns       | $p<0.01$              |
|                               | 0.25 vs. 1.0             | $p<0.001$  | ns       | ns                    |
| z-potential (mV)              | 0.05 vs. 0.25            | ns         | ns       | $p<0.001$             |
|                               | 0.05 vs. 1.0             | $p<0.05$   | $p<0.01$ | $p<0.0001$            |
|                               | 0.25 vs. 1.0             | $p<0.05$   | $p<0.05$ | ns                    |
